# Supplementary material for: Protected amine-functional initiators for the synthesis of α-amine homo- and heterotelechelic poly(2-ethyl-2-oxazoline)s
Source: Royal Society of Chemistry journal article supplement (doi:10.1039/d2py00649a), 2022-01-01
Supplement: d2py00649a1.pdf [file d2py00649a1.pdf]

## Supporting Information

### **Protected amine-functional initiators for the synthesis of $\alpha$ -amine homo- and heterotelechelic poly(2-ethyl-2-oxazoline)s**

Zihnil A. I. Mazrad,<sup>a,#</sup> May Lai,<sup>a,#</sup> Thomas P. Davis,<sup>b</sup> Joseph A. Nicolazzo,<sup>a</sup> Kristofer  
J. Thurecht<sup>b,c</sup> Meike N. Leiske,<sup>a</sup> †Kristian Kempe<sup>a,d,\*</sup>

<sup>a</sup>Drug Delivery, Disposition and Dynamics, Monash Institute of Pharmaceutical  
Sciences, Monash University, Parkville, VIC 3052, Australia

<sup>b</sup>Australian Institute for Bioengineering and Nanotechnology, The University of  
Queensland, Australia

<sup>c</sup>Centre for Advanced Imaging, The University of Queensland, Australia

<sup>d</sup>Materials Science and Engineering, Monash University, Clayton, VIC 3800, Australia

†Current address: Department of Organic and Macromolecular Chemistry, Ghent  
University, Krijgslaan 281, S4, 9000 Ghent, Belgium

# Authors contributed equally

\*Correspondence to [kristian.kempe@monash.edu](mailto:kristian.kempe@monash.edu)

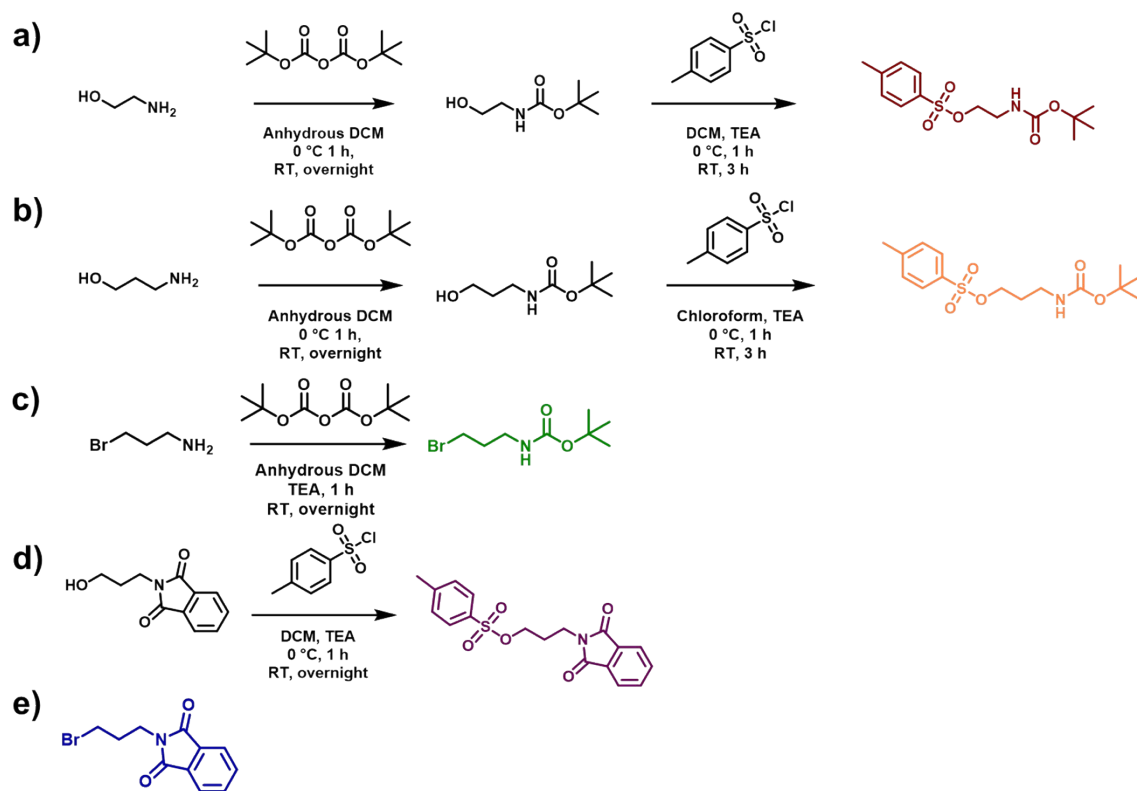

**Figure S1.** Schematic representation of the initiator synthesis. (a) BOC-NH<sub>2</sub>-C2-Tos, (b) BOC-NH<sub>2</sub>-C3-Tos, (c) BOC-NH<sub>2</sub>-C3-Br, (d) phthalimide-NH<sub>2</sub>-C3-Tos, and (e) commercially available phthalimide-NH<sub>2</sub>-C3-Br.

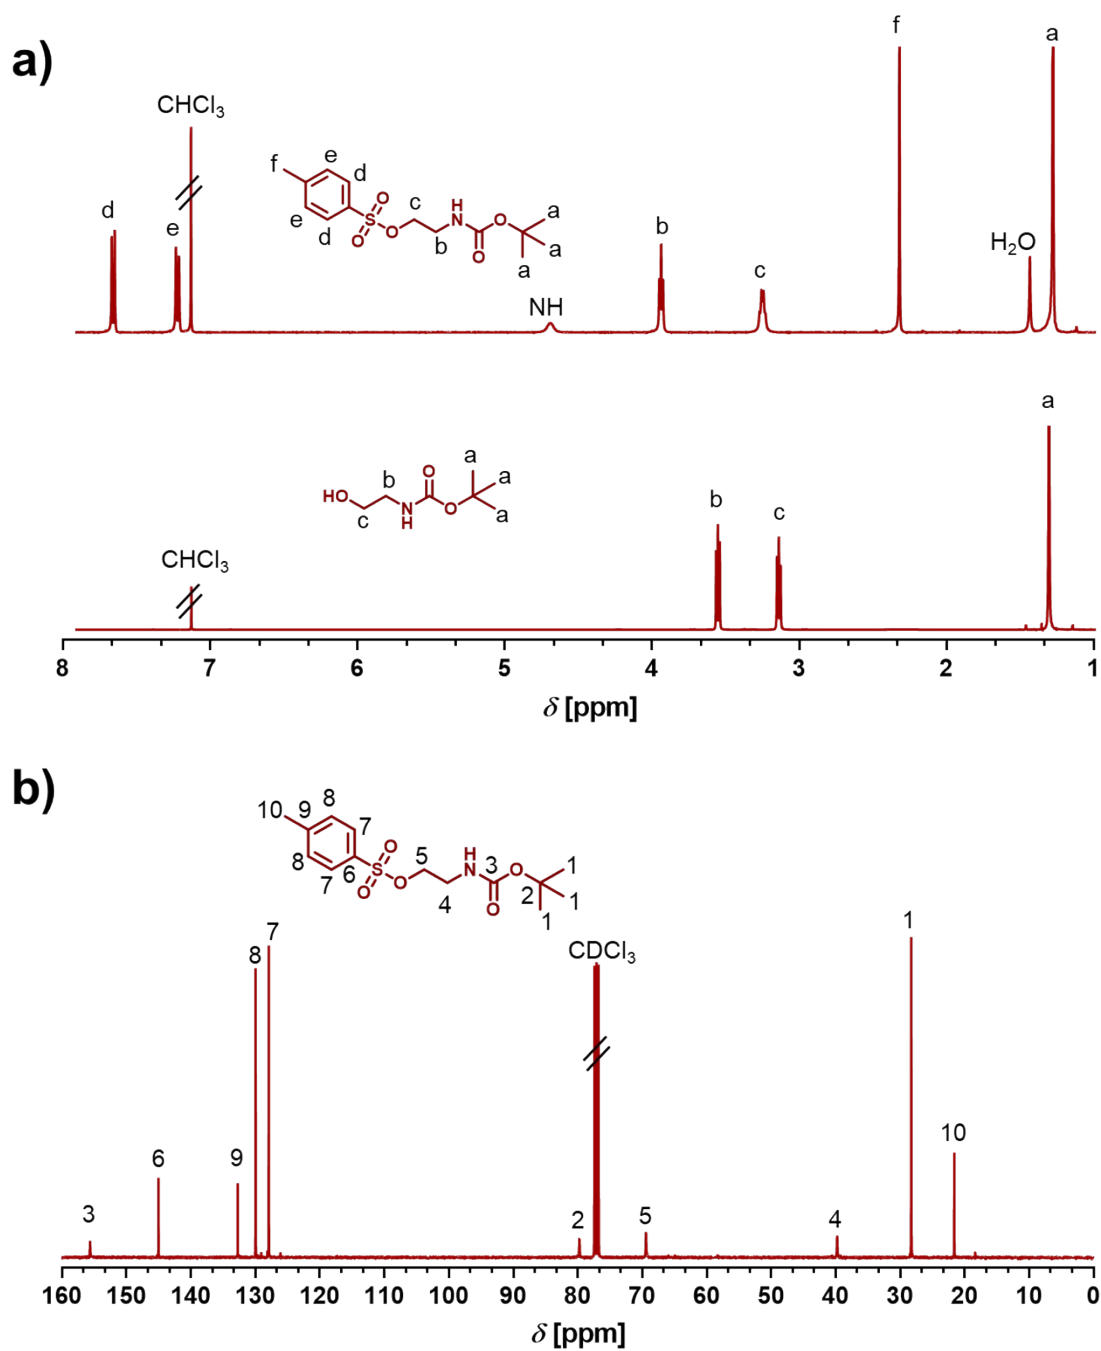

**Figure S2.** Characterization of BOC-NH<sub>2</sub>-C2-Tos. (a) <sup>1</sup>H NMR (400 MHz, CDCl<sub>3</sub>) and (b) <sup>13</sup>C NMR (400 MHz, CDCl<sub>3</sub>).

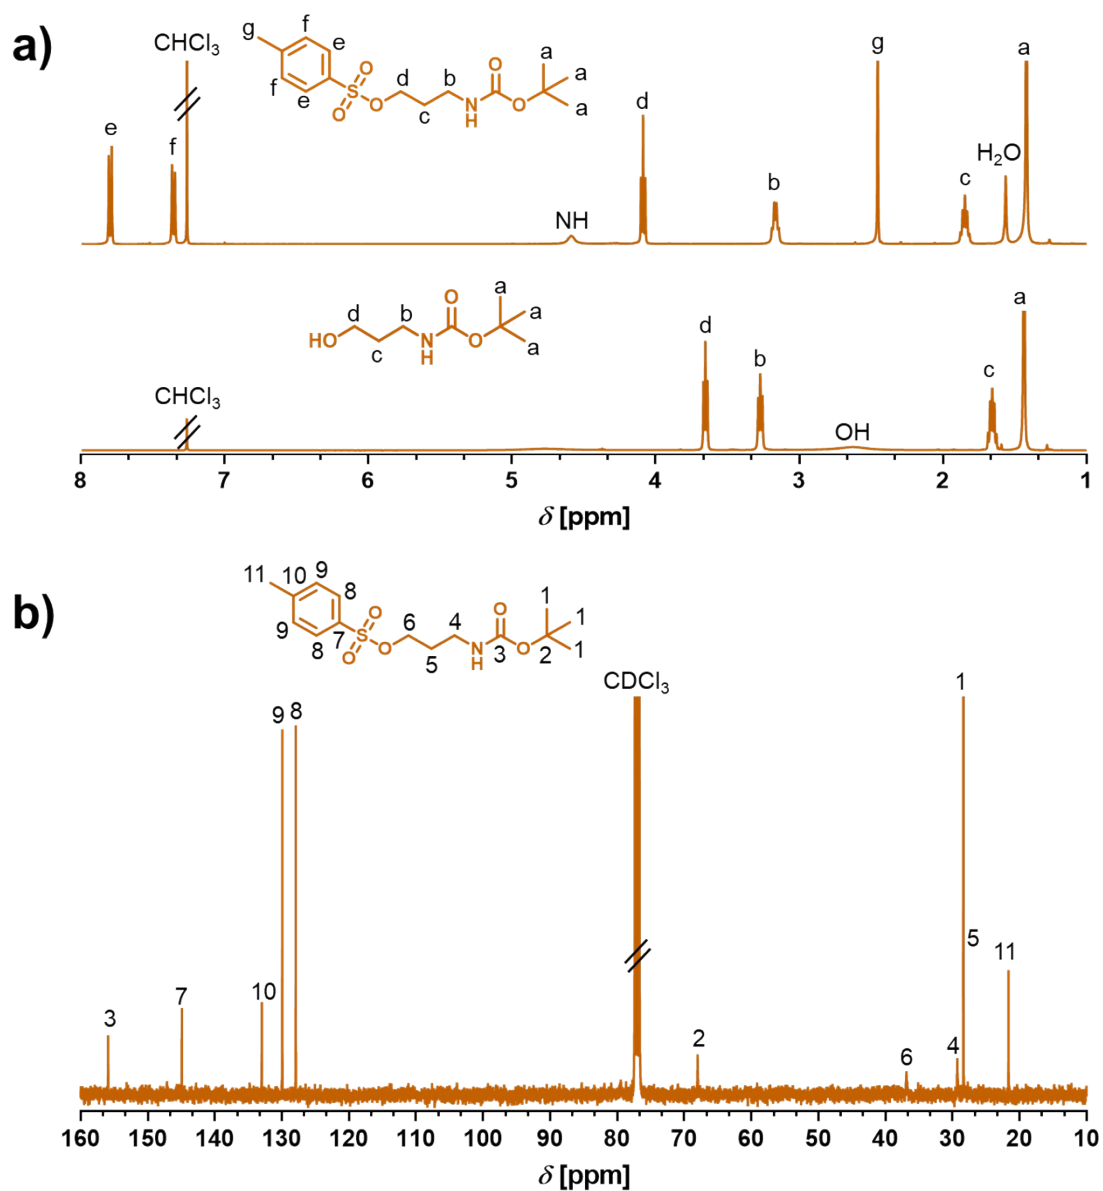

**Figure S3.** Characterization of BOC-NH<sub>2</sub>-C3-Tos. (a) <sup>1</sup>H NMR (400 MHz, CDCl<sub>3</sub>) and (b) <sup>13</sup>C NMR (400 MHz, CDCl<sub>3</sub>).

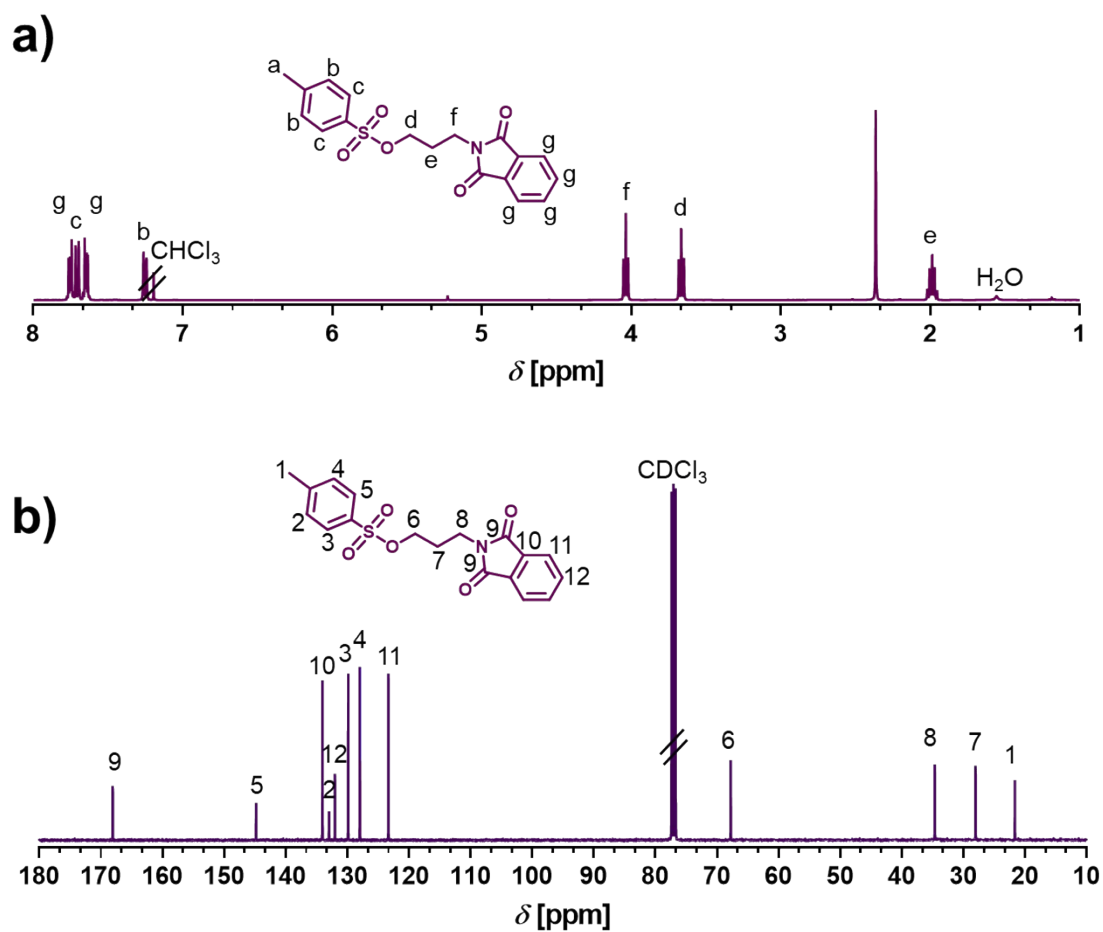

**Figure S4.** Characterization of phthalimide-NH<sub>2</sub>-C<sub>3</sub>-Tos. (a) <sup>1</sup>H NMR (400 MHz, CDCl<sub>3</sub>) and (b) <sup>13</sup>C NMR (400 MHz, CDCl<sub>3</sub>).

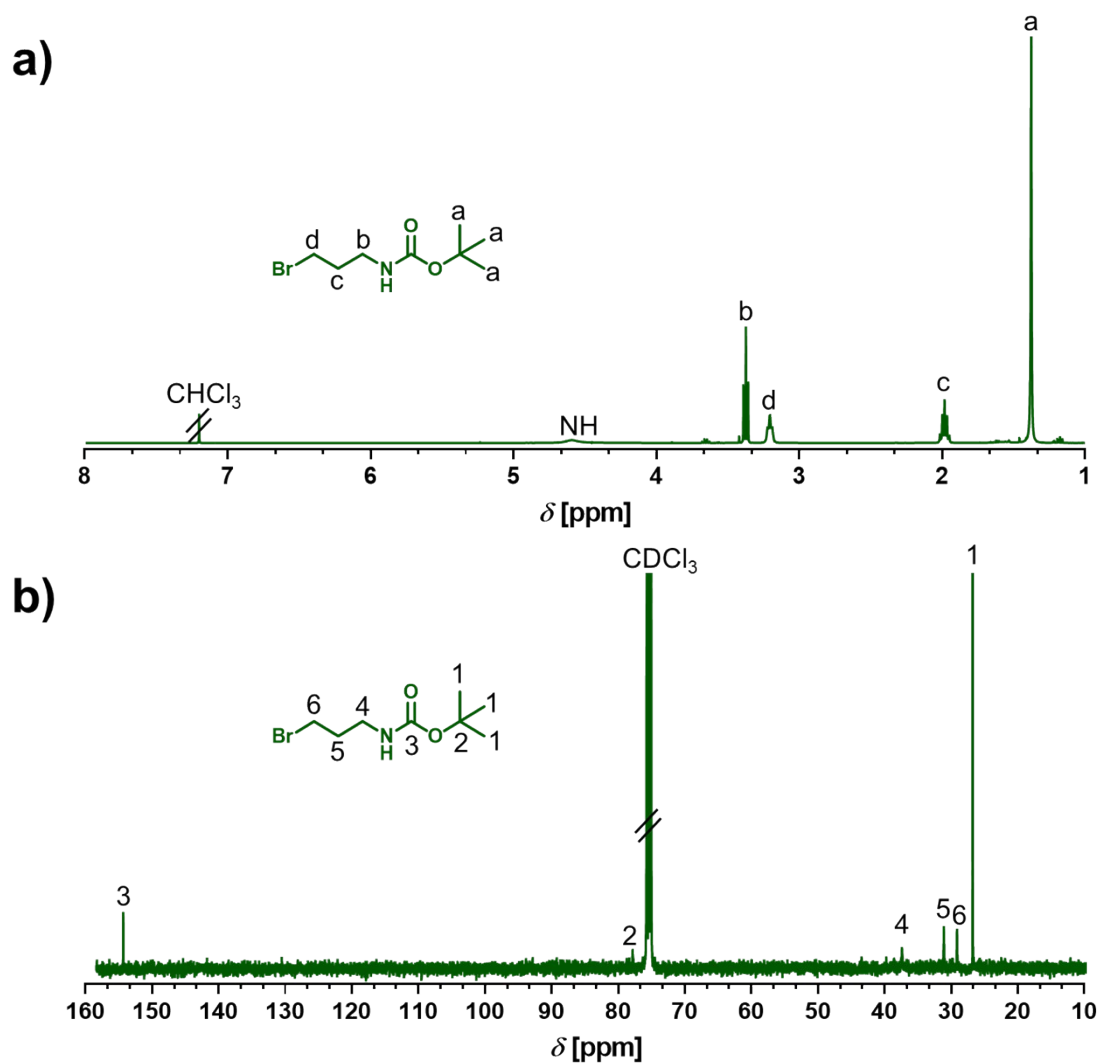

**Figure S5.** Characterization of BOC-NH<sub>2</sub>-C3-Br. (a) <sup>1</sup>H NMR (400 MHz, CDCl<sub>3</sub>) and (b) <sup>13</sup>C NMR (400 MHz, CDCl<sub>3</sub>).

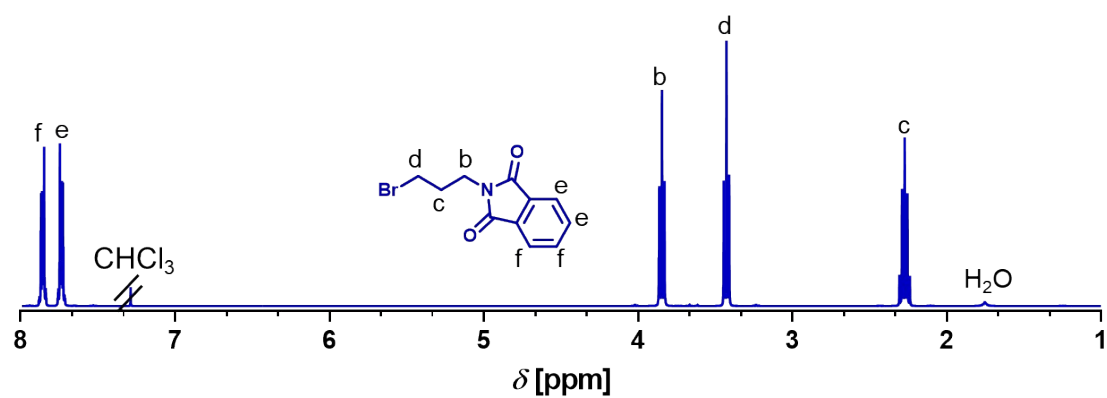

**Figure S6.** <sup>1</sup>H NMR (400 MHz, CDCl<sub>3</sub>) of phthalimide-NH<sub>2</sub>-C3-Br.



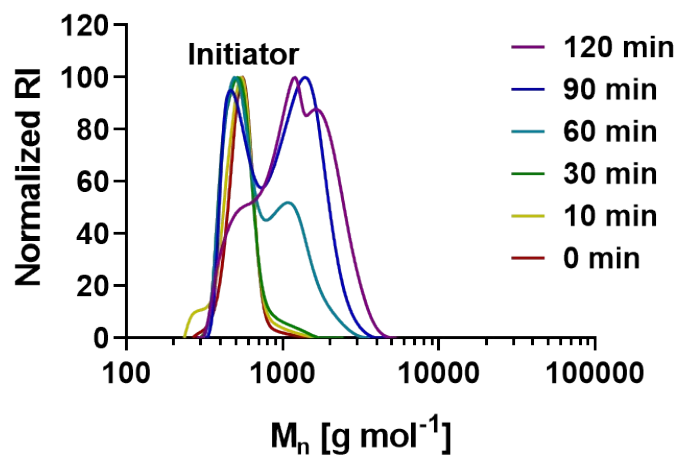

**Figure S8.** Evolution of the molar mass determined by SEC (DMAc, PS-calibration) at indicated polymerization times of EtOx initiated by BOC-NH<sub>2</sub>-C2-Tos ([M]/[I] = 15) in MeCN at 80 °C.

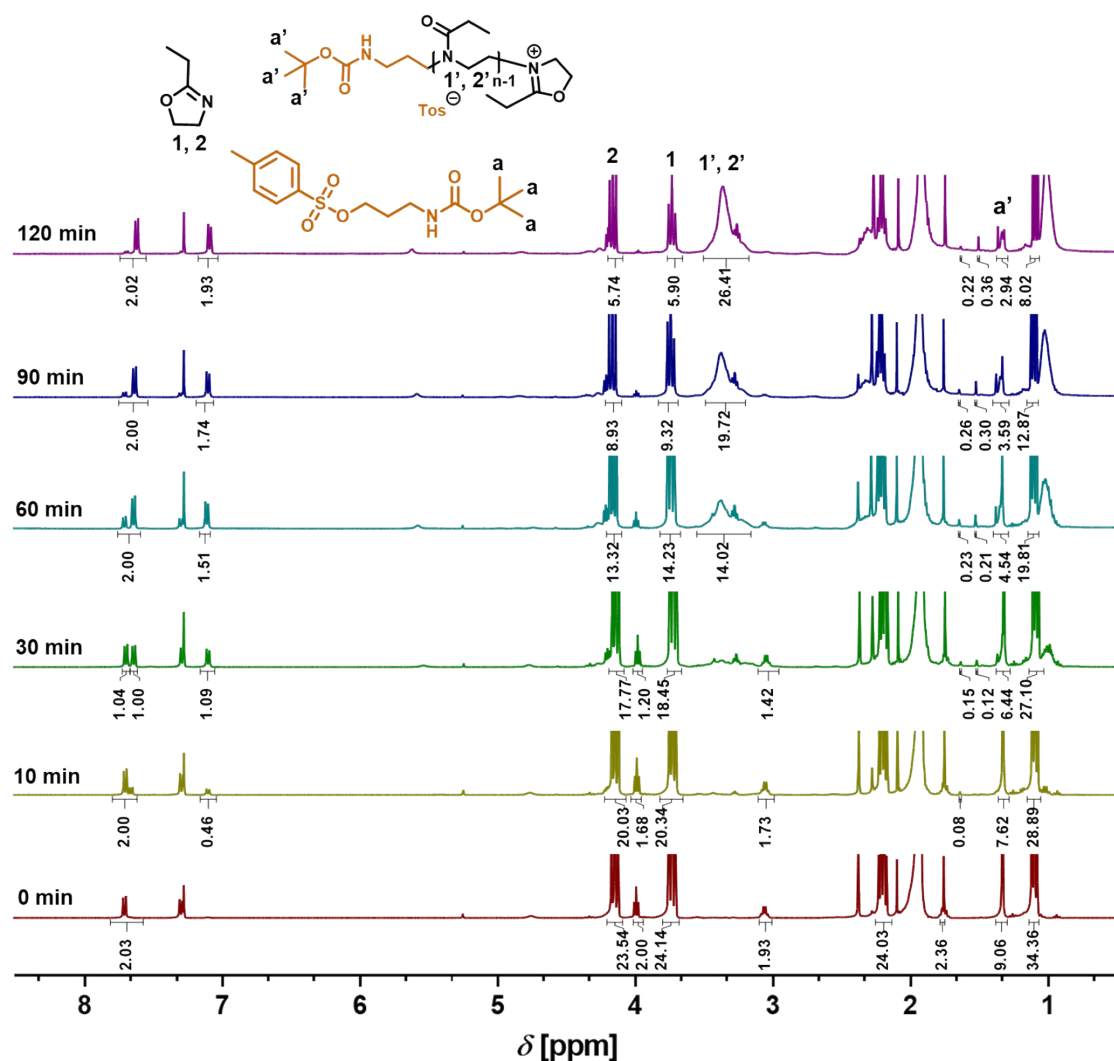

**Figure S9.** Kinetic studies of the CROP of EtOx initiated by BOC-NH<sub>2</sub>-C<sub>3</sub>-Tos ([M]/[I] = 15) in MeCN at 80 °C. <sup>1</sup>H NMR spectra (400 MHz, CDCl<sub>3</sub>) of reaction mixtures at indicated reaction times showing the reduction of the 2-oxazoline monomer peaks (H1 and H2) and the increase of the resulting backbone signals (H1' and H2') over time. The signals with an apostrophe (Ha') represent the deprotected *tert*-butyl protons (Ha) from the initiator and polymer. The CHCl<sub>3</sub> (7.26 ppm) signals were used as a standard for chemical shift of overlaid spectra.

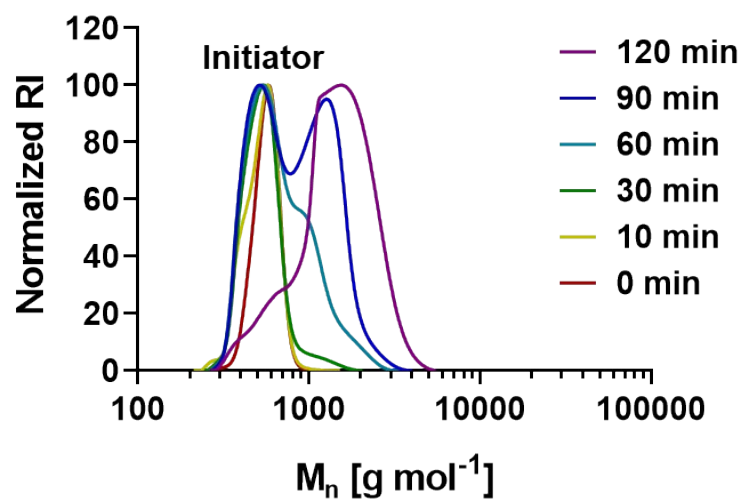

**Figure S10.** Evolution of the molar mass determined by SEC (DMAc, PS-calibration) at indicated polymerization times of EtOx initiated by BOC-NH<sub>2</sub>-C3-Tos ([M]/[I] = 15) in MeCN at 80 °C.

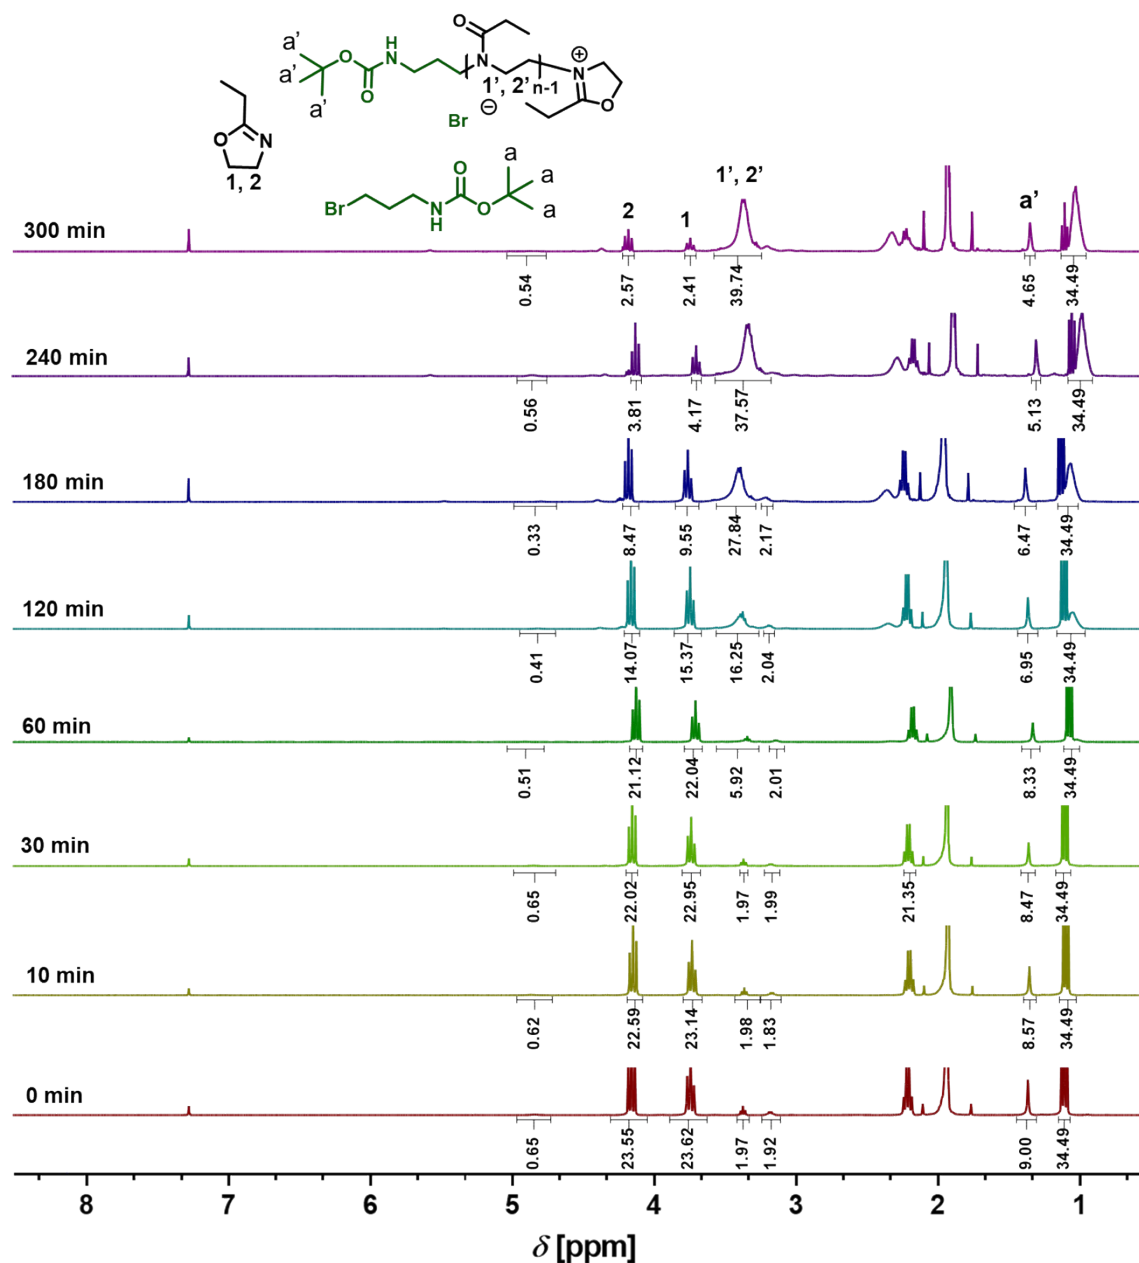

**Figure S11.** Kinetic studies of the CROP of EtOx initiated by BOC-NH<sub>2</sub>-C3-Br ([M]/[I] = 15) in MeCN at 80 °C. <sup>1</sup>H NMR spectra (400 MHz, CDCl<sub>3</sub>) of reaction mixtures at indicated reaction times showing the reduction of the 2-oxazoline monomer peaks (H1 and H2) and the increase of the resulting backbone signals (H1' and H2') over time.

The signals with an apostrophe (Ha') represent the deprotected *tert*-butyl protons (Ha) from the initiator and polymer. The CHCl<sub>3</sub> (7.26 ppm) signals were used as a standard for chemical shift of overlaid spectra.

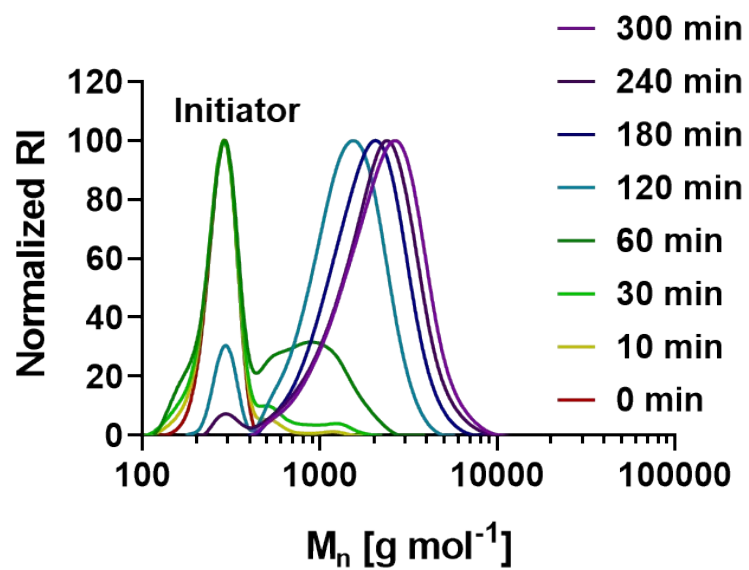

**Figure S12.** Evolution of the molar mass determined by SEC (DMAc, PS-calibration) at indicated polymerization times of EtOx initiated by BOC-NH<sub>2</sub>-C3-Br ([M]/[I] = 15) in MeCN at 80 °C.

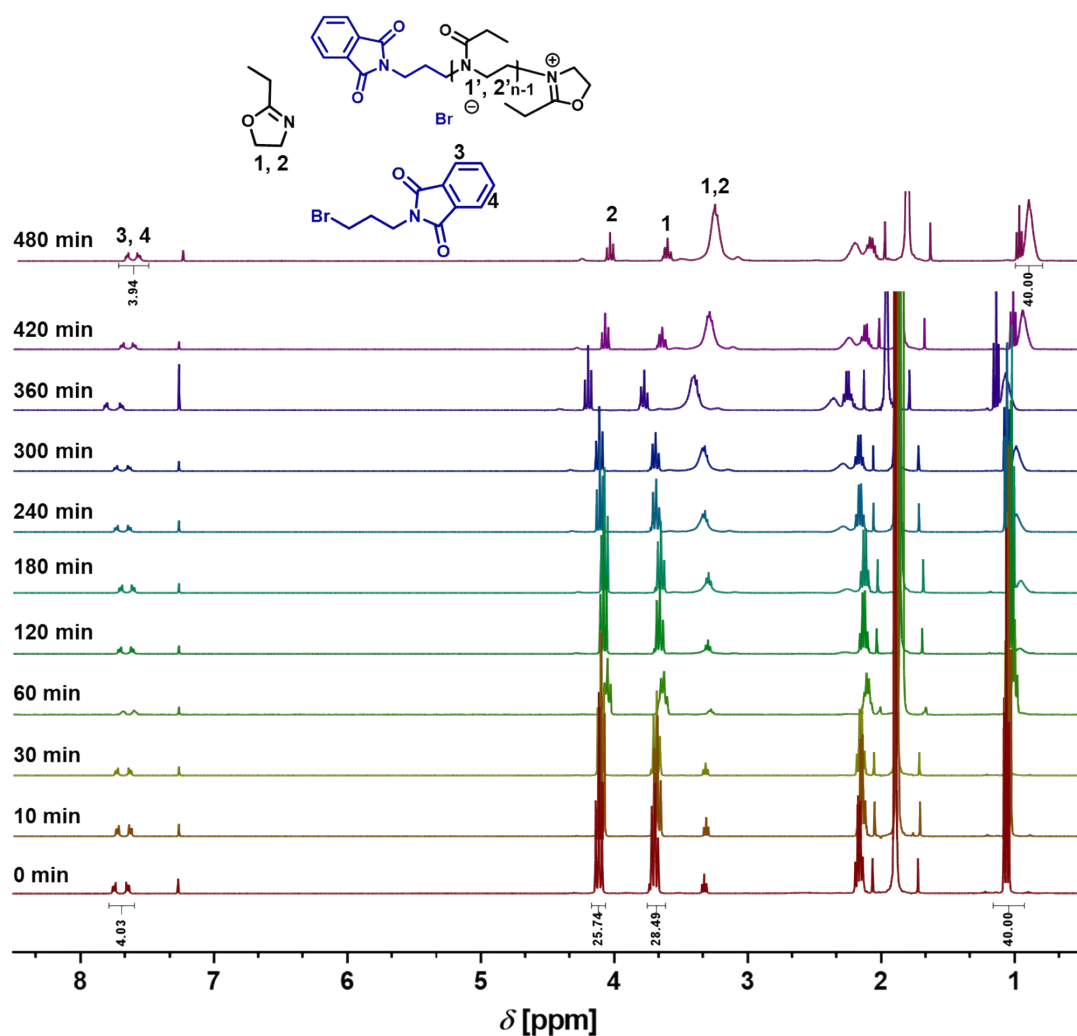

**Figure S13.** Kinetic studies of the CROP of EtOx initiated by phthalimide-NH<sub>2</sub>-C<sub>3</sub>-Br ([M]/[I] = 15) in MeCN at 80 °C. <sup>1</sup>H NMR spectra (400 MHz, CDCl<sub>3</sub>) of reaction mixtures at indicated reaction times showing the reduction of the 2-oxazoline monomer peaks (H1 and H2) and the increase of the resulting backbone signals (H1' and H2') over time. The CHCl<sub>3</sub> (7.26 ppm) signals were used as a standard for chemical shift of overlaid spectra

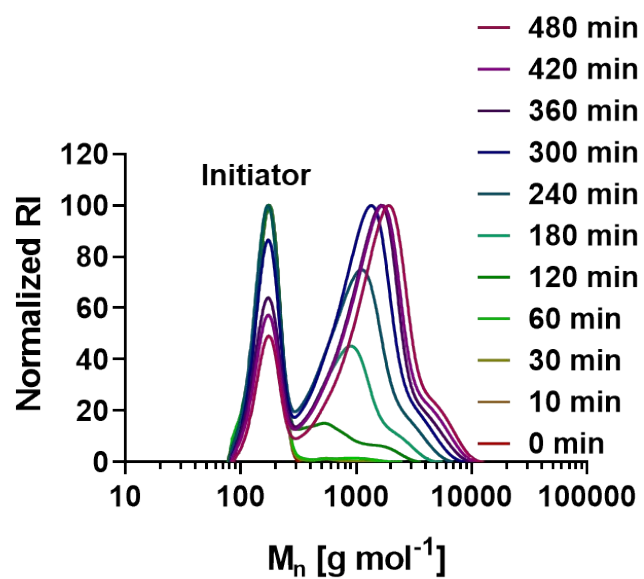

**Figure S14.** Evolution of the molar mass determined by SEC (DMAc, PS-calibration) at indicated polymerization times of EtOx initiated by phthalimide-NH<sub>2</sub>-C3-Br ([M]/[I] = 15) in MeCN at 80 °C.

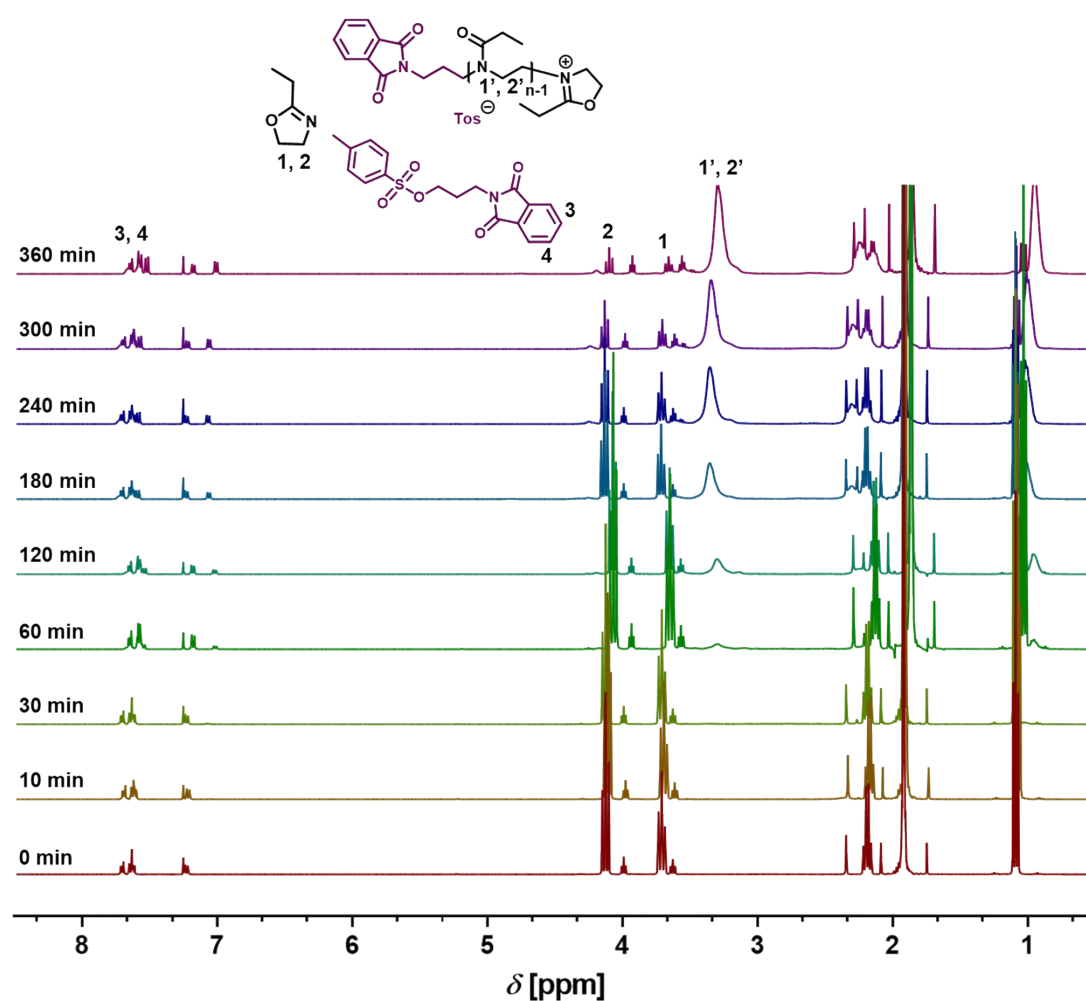

**Figure S15.** Kinetic studies of the CROP of EtOx initiated by phthalimide- $\text{NH}_2$ -C3-Tos ( $[\text{M}]/[\text{I}] = 15$ ) in MeCN at  $80^\circ\text{C}$ .  $^1\text{H}$  NMR spectra (400 MHz,  $\text{CDCl}_3$ ) of reaction mixtures at indicated reaction times showing the reduction of the 2-oxazoline monomer peaks (H1 and H2) and the increase of the resulting backbone signals (H1' and H2') over time. The  $\text{CHCl}_3$  (7.26 ppm) signals were used as a standard for chemical shift of overlaid spectra.

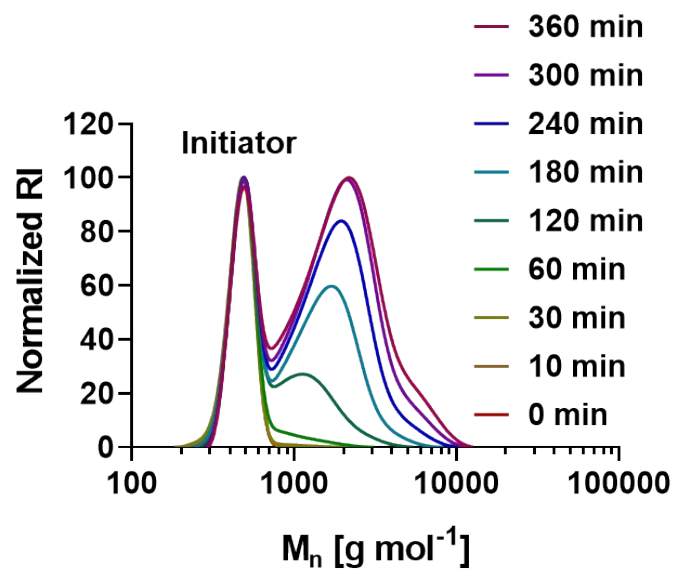

**Figure S16.** Evolution of the molar mass determined by SEC (DMAc, PS-calibration) at indicated polymerization times of EtOx initiated by phthalimide-NH<sub>2</sub>-C3-Tos ( $[M]/[I] = 15$ ) in MeCN at 80 °C.

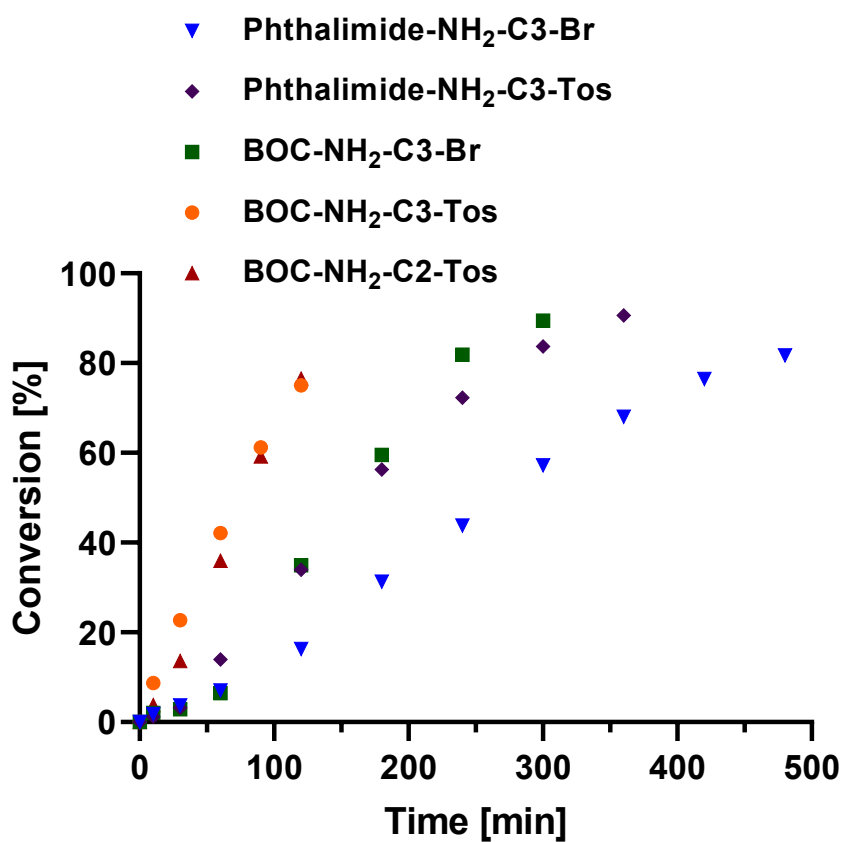

**Figure S17.** Monomer conversion versus polymerization time for different initiators concentrations of the CROP of EtOx ( $[M]/[I] = 15$ ) in MeCN at 80 °C.

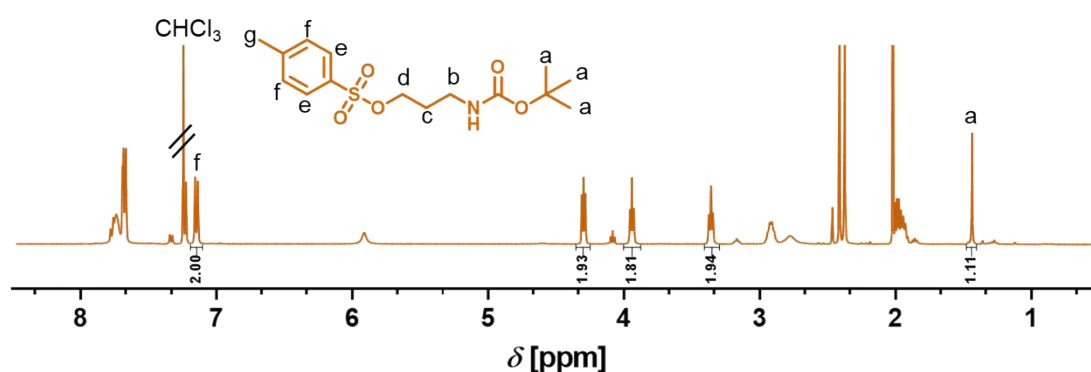

**Figure S18.**  $^1\text{H}$  NMR spectrum of BOC-NH<sub>2</sub>-C3-Tos after 2 h of incubation at 80 °C in MeCN (400 MHz, CDCl<sub>3</sub>).

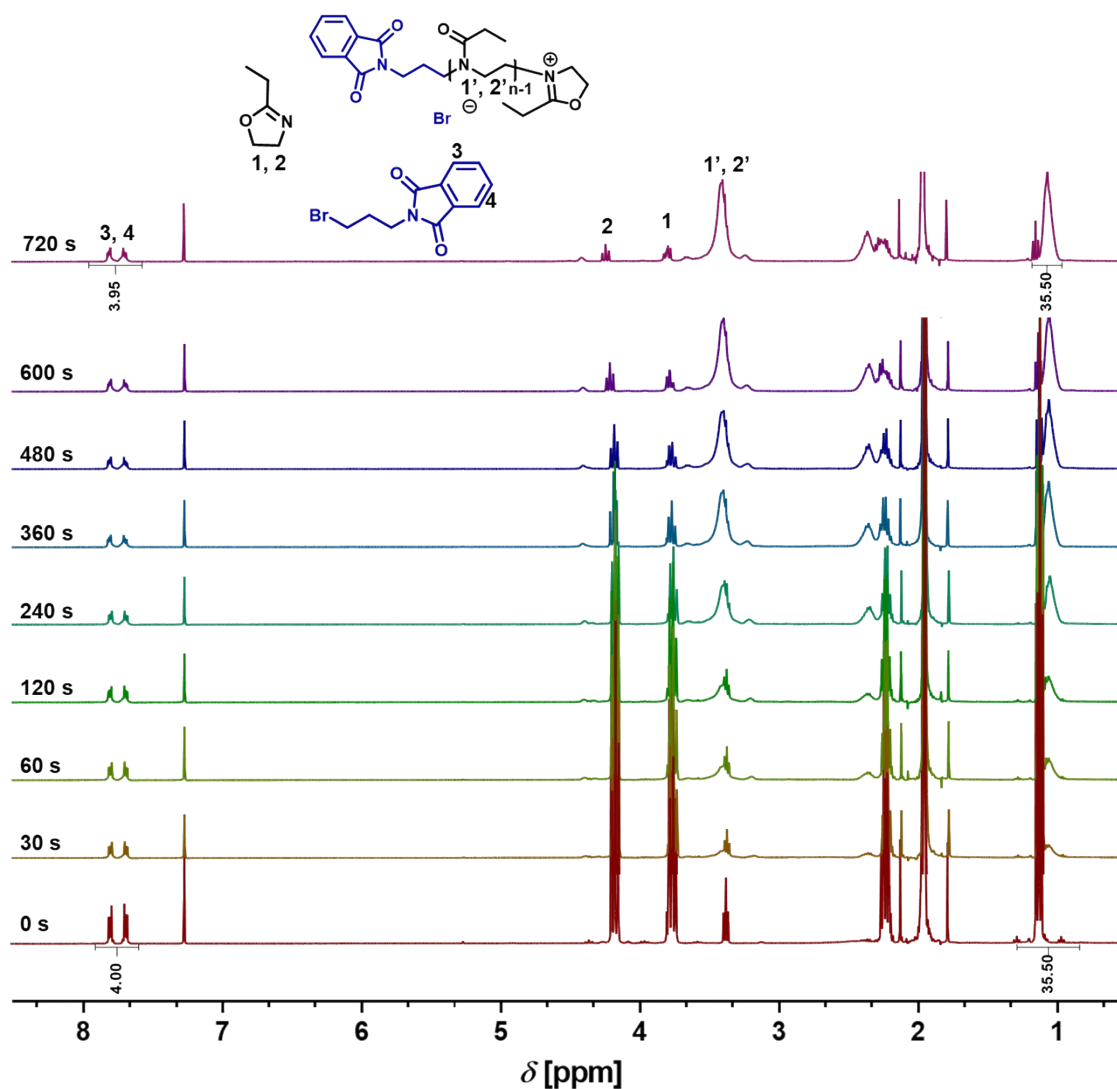

**Figure S19.** Kinetic studies of EtOx initiated with phthalimide-NH<sub>2</sub>-C3-Br ([M]/[I] = 15) in MeCN at 140 °C.  $^1\text{H}$  NMR spectra (400 MHz, CDCl<sub>3</sub>) of reaction mixtures at indicated reaction times showing the reduction of the 2-oxazoline monomer peaks (H1

and H2) and the increase of the resulting backbone signals (H1' and H2') over time. The CHCl<sub>3</sub> (7.26 ppm) signals were used as a standard for chemical shift of overlaid spectra.

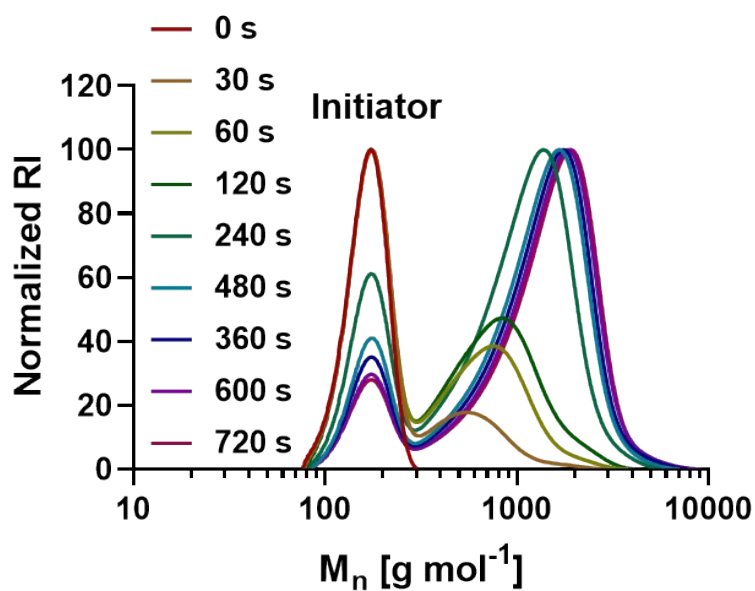

**Figure S20.** Evolution of the molar mass determined by SEC (DMAc, PS-calibration) at indicated polymerization times of EtOx initiated by phthalimide-NH<sub>2</sub>-C3-Br ([M]/[I] = 15) in MeCN at 140 °C.

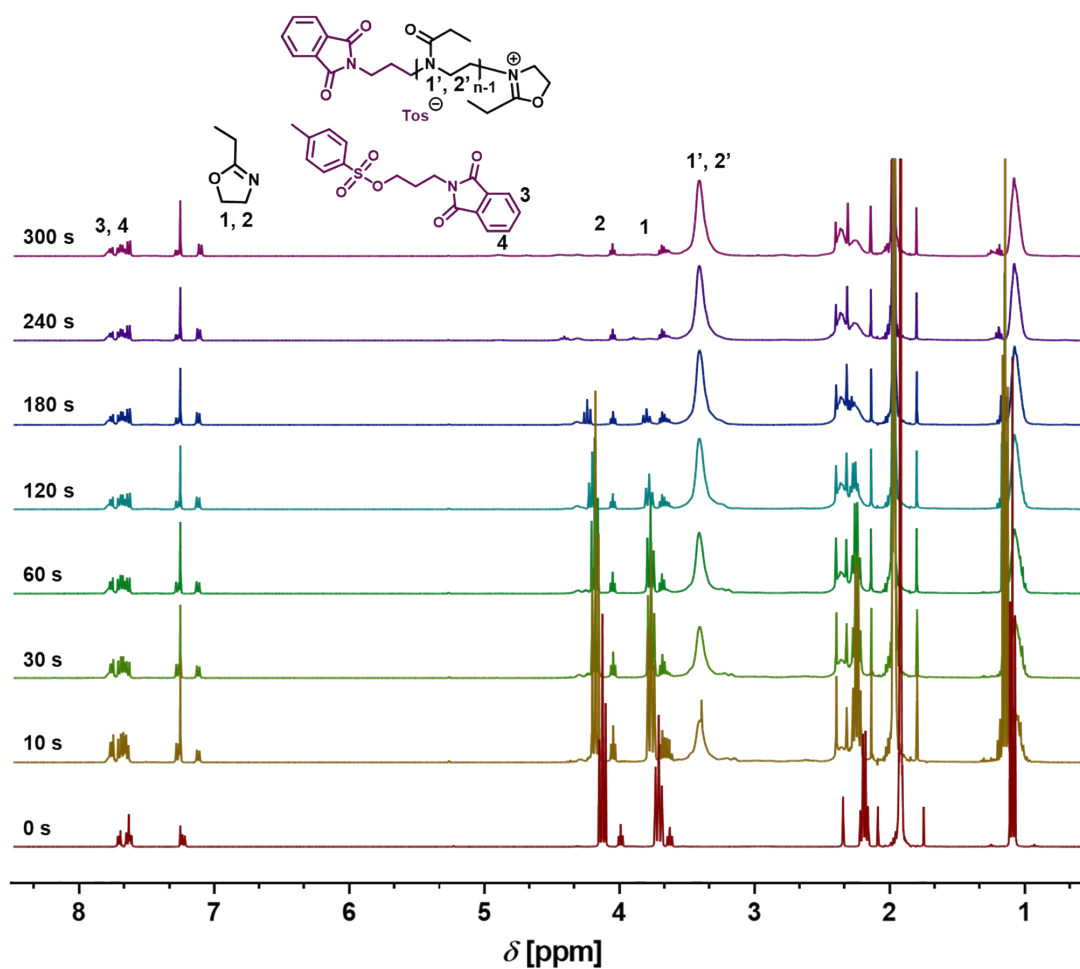

**Figure 21.** Kinetic studies of EtOx initiated phthalimide-NH<sub>2</sub>-C3-Tos ([M]/[I] = 15) in MeCN at 140 °C. <sup>1</sup>H NMR spectra (400 MHz, CDCl<sub>3</sub>) of reaction mixtures at indicated reaction times showing the reduction of the 2-oxazoline monomer peaks (H1 and H2) and the increase of the resulting backbone signals (H1' and H2') over time. CHCl<sub>3</sub> (7.26 ppm) signals were used as a standard for chemical shift of overlaid spectra.

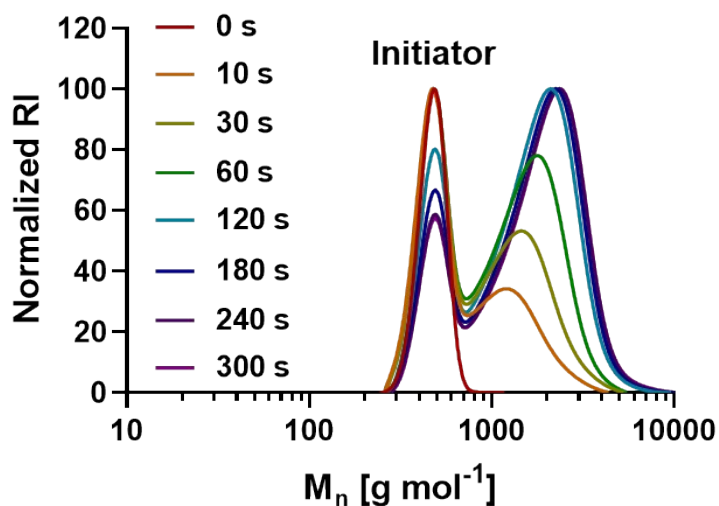

**Figure S22.** Evolution of the molar mass determined by SEC (DMAc, PS-calibration) at indicated polymerization times of EtOx initiated by phthalimide-NH<sub>2</sub>-C3-Tos ([M]/[I] = 15) in MeCN at 140 °C.

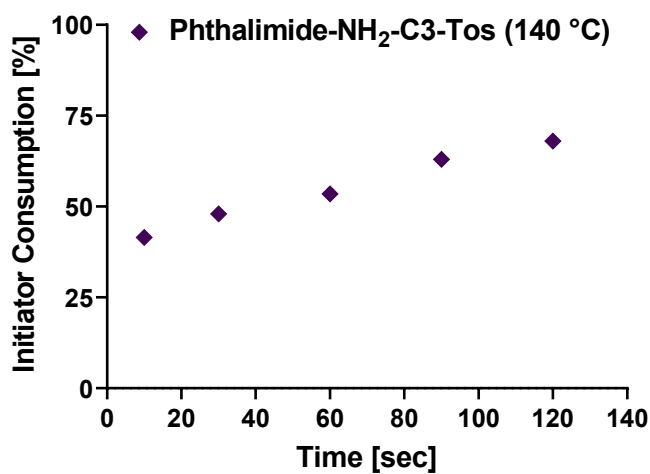

**Figure S23.** Evolution of the initiator consumption with polymerization time of the kinetic studies for cationic ring-opening polymerization of EtOx in MeCN using phthalimide-NH<sub>2</sub>-C3-Tos at ([M]/[I] = 15; T = 140 °C, [M] = 2 M) evaluated by <sup>1</sup>H NMR measurements.

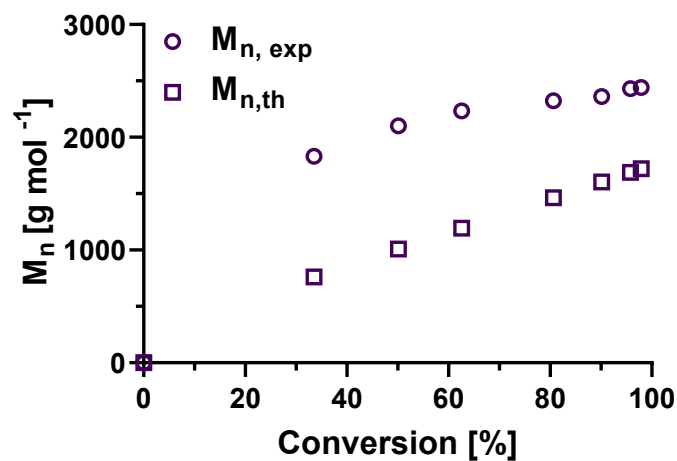

**Figure S24.** Summary of the theoretical molar mass ( $M_{n,th}$ ) determined by conversion and the initial  $[M]/[I] = 15$  in MeCN at 80 °C using  $^1\text{H}$  NMR and the molar mass ( $M_{n,exp}$ ) determined by the theoretical molar mass and initiator consumption originating from  $^1\text{H}$  NMR of PEtOx initiated by phthalimide- $\text{NH}_2$ -C3-Tos.

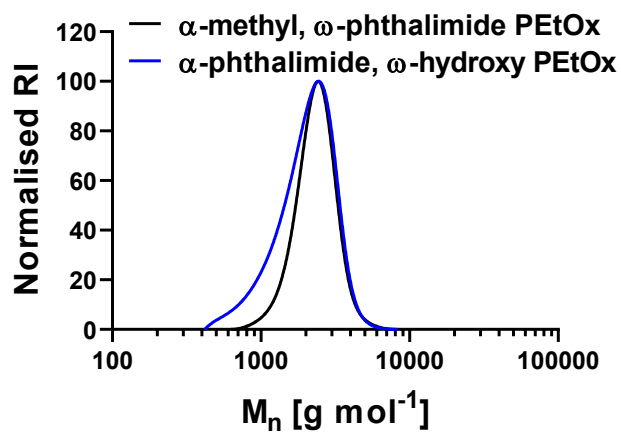

**Figure S25.** Molar mass distribution traces obtained from SEC measurements (DMAc, PS-cal.) of  $\alpha$ -phthalimide,  $\omega$ -hydroxy PEtOx and  $\alpha$ -methyl,  $\omega$ -phthalimide PEtOx.

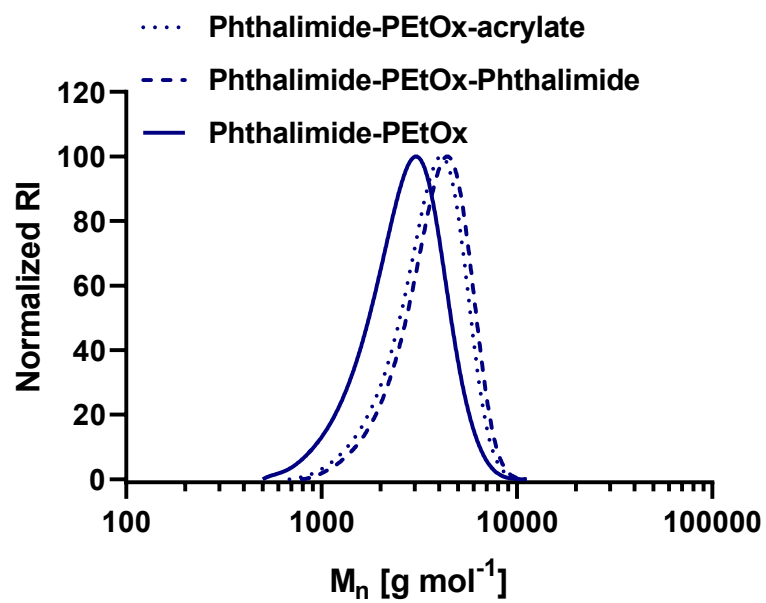

**Figure S26.** Molar mass distribution traces obtained from SEC measurements (DMAc, PS-cal.) of the telechelic PEtOx polymers.

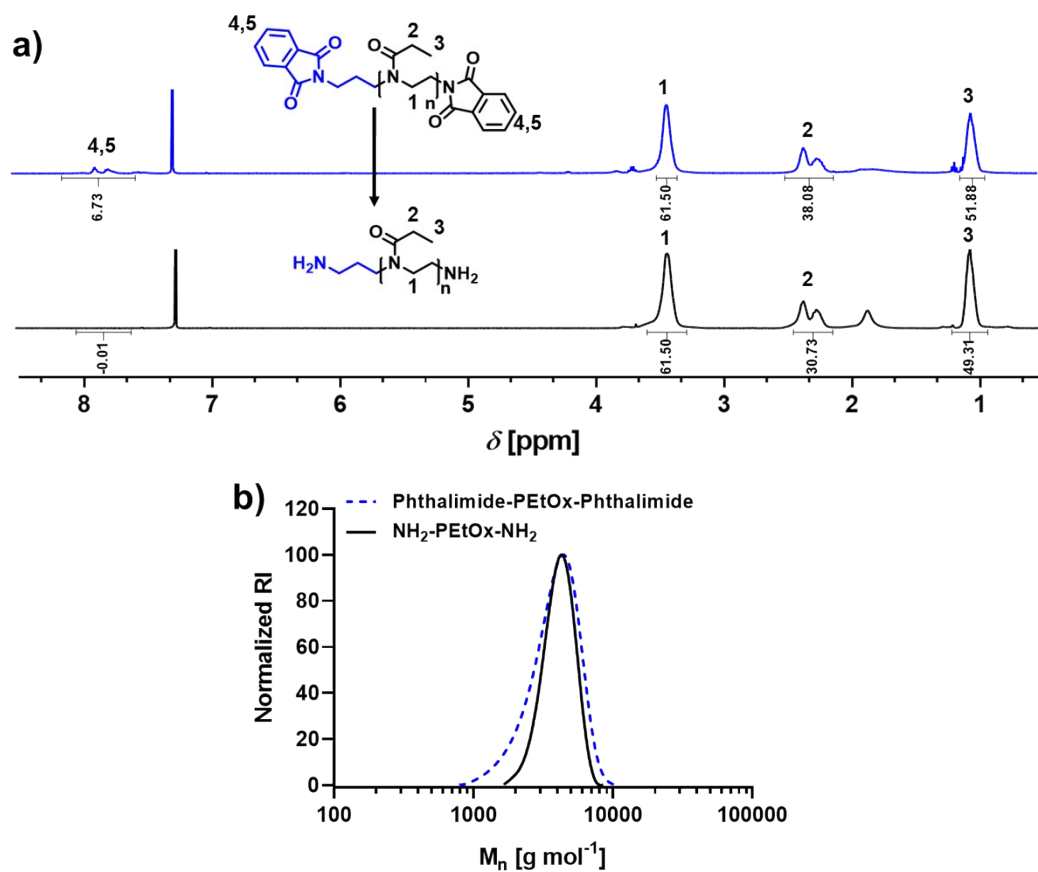

**Figure S27.** (a)  $^1\text{H}$  NMR spectra of phthalimide  $\alpha$  and  $\omega$  functionalized PEtOx (400 MHz,  $\text{CDCl}_3$ ), before (top - blue) and after deprotection (bottom - black). (b) Molar mass distribution traces obtained from SEC measurements (DMAc, PS-cal.) before (dashed blue line) and after deprotection (solid black line) of the phthalimide.
